# Supplementary figures and images for: Temperature dependence of the crystal structure and luminescence properties of [Pt{4′-(o-ClC6H4)trpy}Cl]SbF6 (trpy = 2,2′:6′,2″-terpyridine)Electronic supplementary information (ESI) available: Fig. S1: Unit cell contents of [Pt{4′-(o-ClC6H4)trpy}Cl]SbF6 viewed down the [a]-axis and Fig. S2: View of the cation stack in [Pt{4′-(o-ClC6H4)trpy}Cl]SbF6. See http://www.rsc.org/suppdata/dt/b2/b209754k/
Source: Royal Society of Chemistry journal article supplement (doi:10.1039/b209754k), 2003-02-11

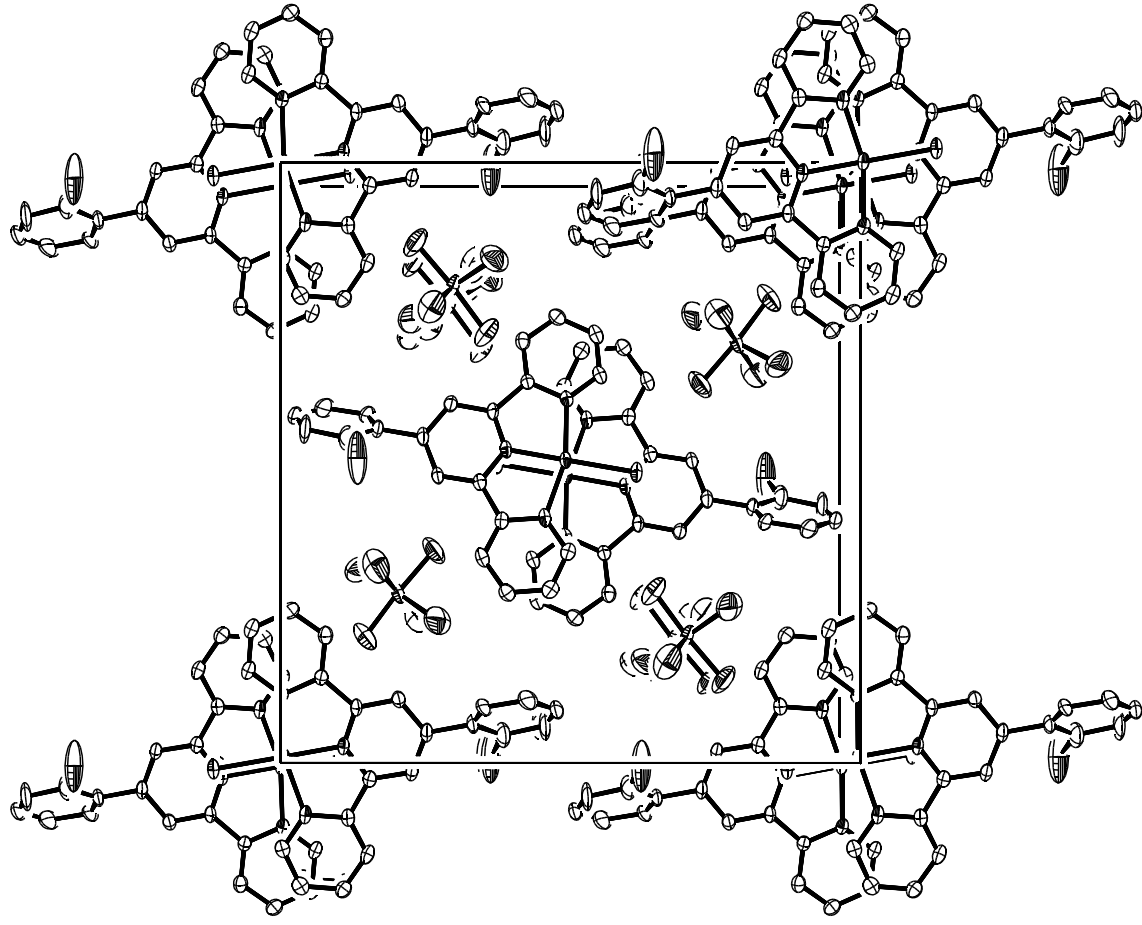

Fig. S1. View down the [a]-axis of the unit cell of [Pt{4'-(o-Cl-Ph)trpy}Cl]SbF<sub>6</sub>

Supplement: b209754k1.pdf [file b209754k1.pdf]

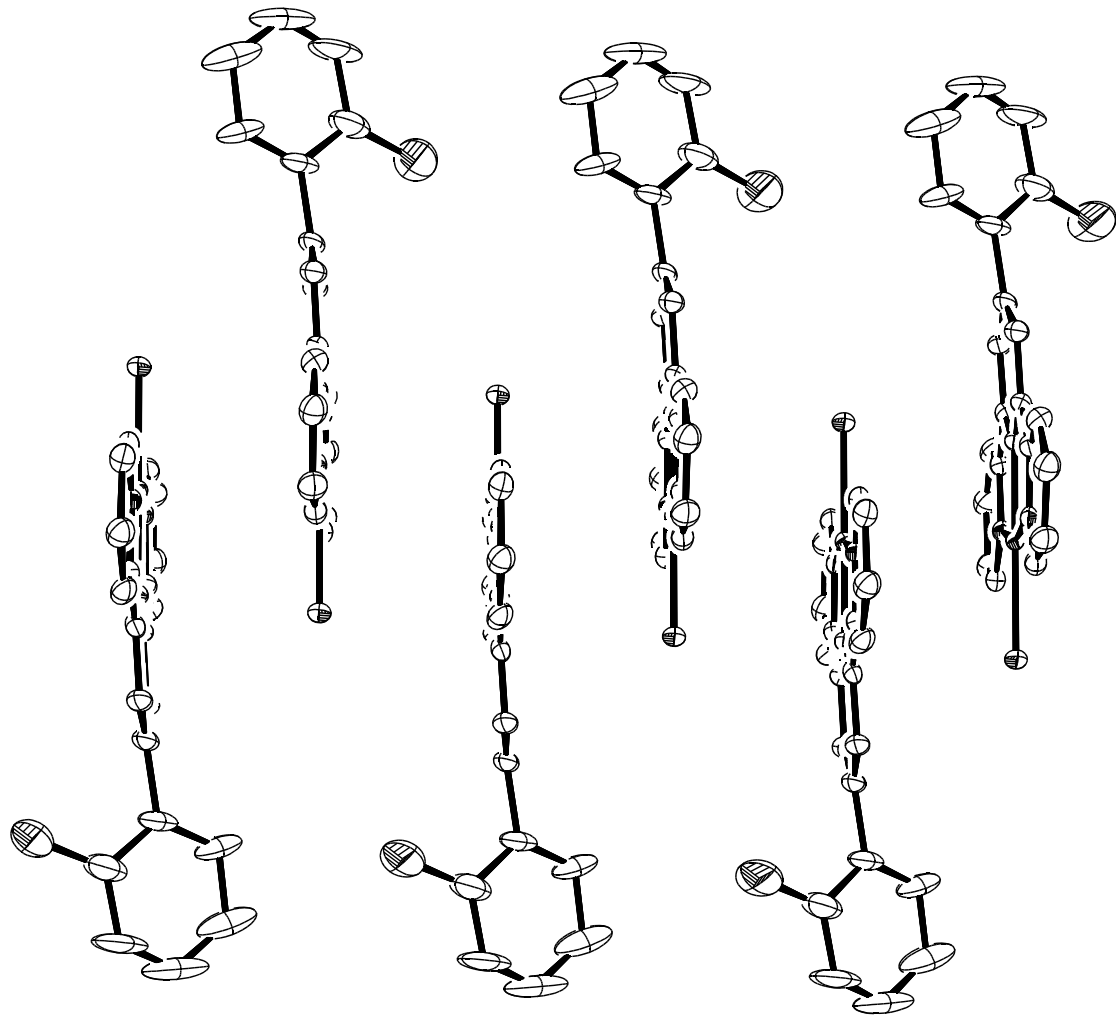

Fig. S2. View of the cation stack in  $[\text{Pt}\{4'-(o\text{-Cl-Ph})\text{trpy}\}\text{Cl}]\text{SbF}_6$

Supplement: b209754k2.pdf [file b209754k2.pdf]
